# Supplementary material
Source: HighWire-hosted journal article supplement (https://ijgc.bmj.com/content/30/9/1458)
Supplement: inline-supplementary-material-1 [file inline-supplementary-material-1.pdf]

## Supplementary tables for video radical vaginal trachelectomy

## Surgical instruments

|                                           |  |
|-------------------------------------------|--|
| 1-5 Breisky specula                       |  |
| Vaginal retractors                        |  |
| 6 long Kocher clamps                      |  |
| 6 modified chrobak clamps                 |  |
| 2 Mikulicz clamps                         |  |
| Overholt clamps with different curving    |  |
| Parametrial clamps with different curving |  |
| Scissors with different curving           |  |
| Tubal forceps "Hepp-Scheidel"             |  |
